# Supplementary material for: In silico investigation of the role of vitamins in cancer therapy through inhibition of MCM7 oncoprotein
Source: PubMed Central journal article supplement — RSC Adv. 2022 Oct 31;12(48):31004–15. doi: 10.1039/d2ra03703c (PMC9619486; doi:10.1039/d2ra03703c), 2022-10-31
Supplement: RA-012-D2RA03703C-s001.pdf [file RA-012-D2RA03703C-s001.pdf]

***In-silico* investigation of the role of vitamins in cancer therapy through  
inhibition of MCM7 oncoprotein**

Sunny Mukherjee<sup>1</sup>, Sucharita Das<sup>2</sup>, Navneeth Sriram<sup>3</sup>, Sandipan Chakraborty<sup>4\*</sup>, Mahesh Kumar Sah<sup>1\*</sup>

<sup>1</sup> Department of Biotechnology, Dr. B.R. Ambedkar National Institute of Technology, Jalandhar, Punjab-144011

<sup>2</sup> Department of Microbiology, University of Calcutta, 35 Ballygunge, Kolkata, 700 019, India

<sup>3</sup>Department of Biosciences and Bioengineering, Indian Institute of Technology, Guwahati, Assam-781039

<sup>4</sup>Centre for Innovation in Molecular and Pharmaceutical Sciences (CIMPS), Dr. Reddy's Institute of Life Sciences, University of Hyderabad Campus, Gachibowli, Hyderabad 500046, India

\* Corresponding authors:

Sandipan Chakraborty ([sandipanchakraborty.13@gmail.com](mailto:sandipanchakraborty.13@gmail.com); [sandipanc@drils.org](mailto:sandipanc@drils.org)), Mahesh Kumar Sah ([sahmk@nitj.ac.in](mailto:sahmk@nitj.ac.in))

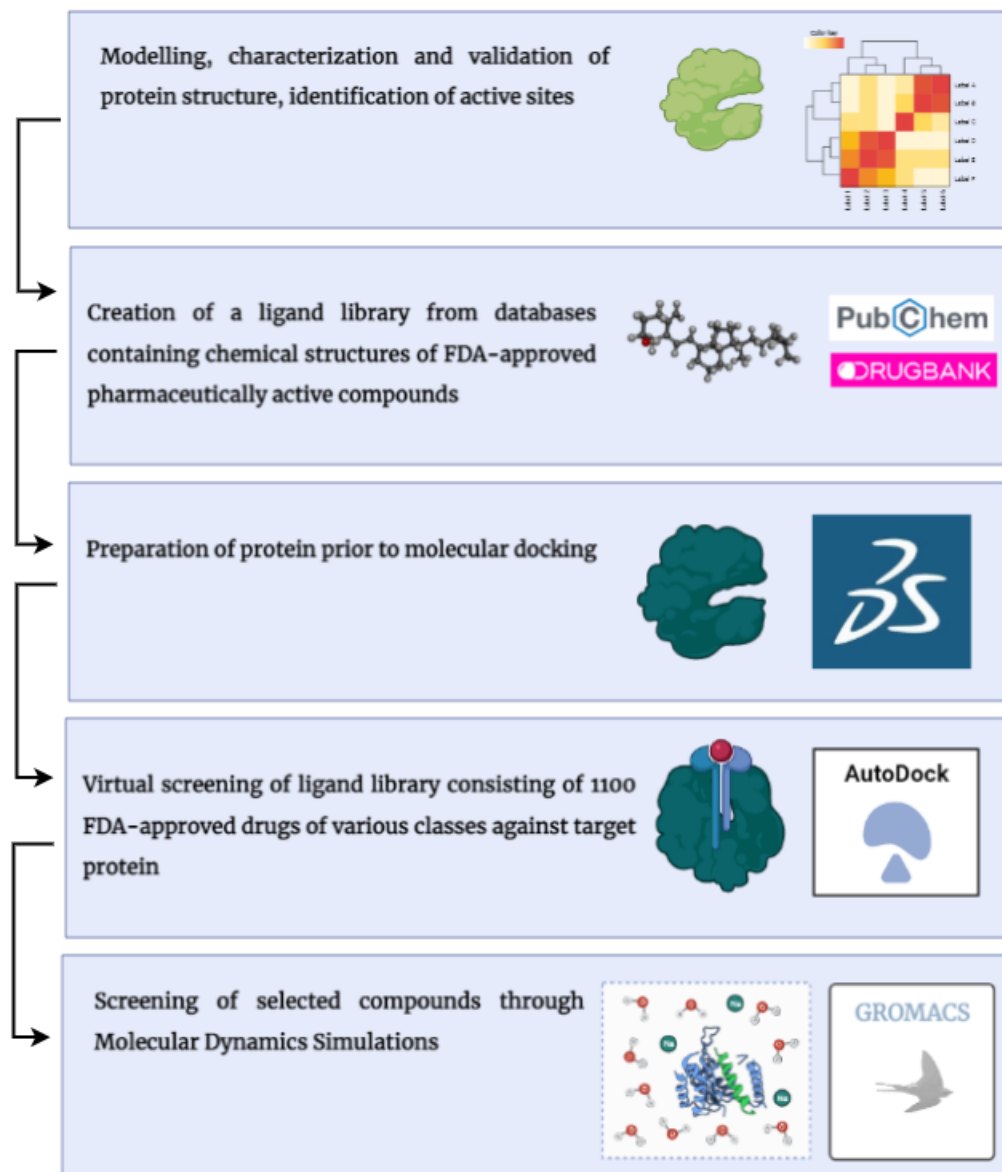

**Figure S1:** Illustration of the research pipeline for the present study

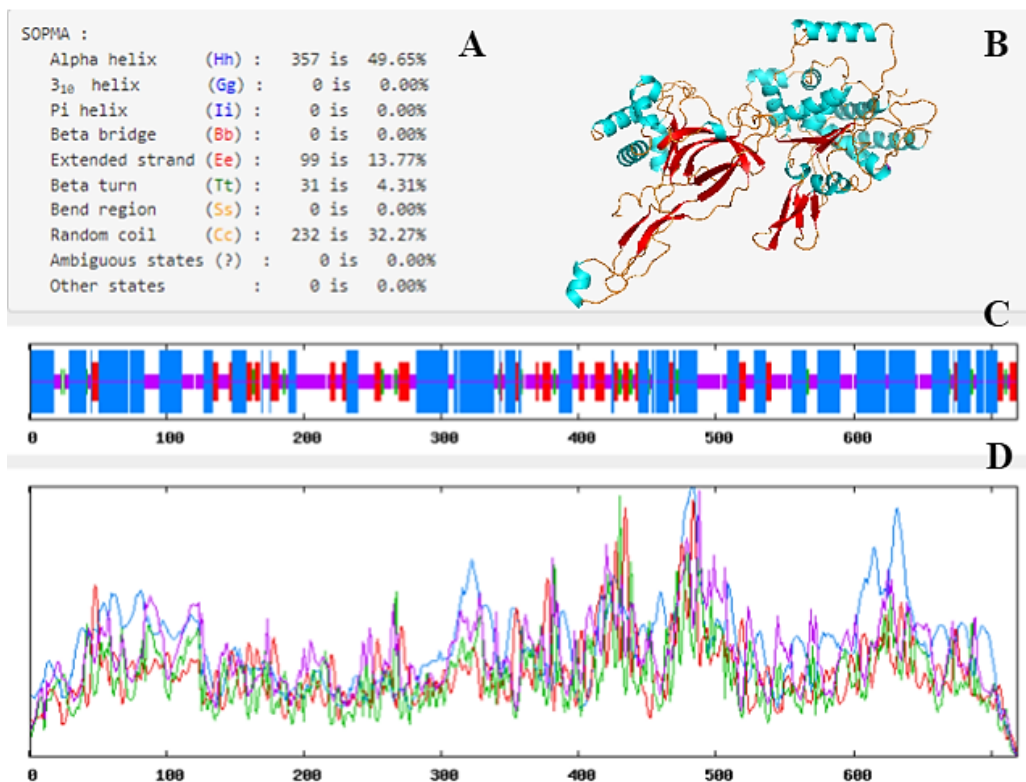

**Figure S2:** SOPMA analysis results reveal the percentage of helices, turns, and loops constituting the secondary structure of MCM7.

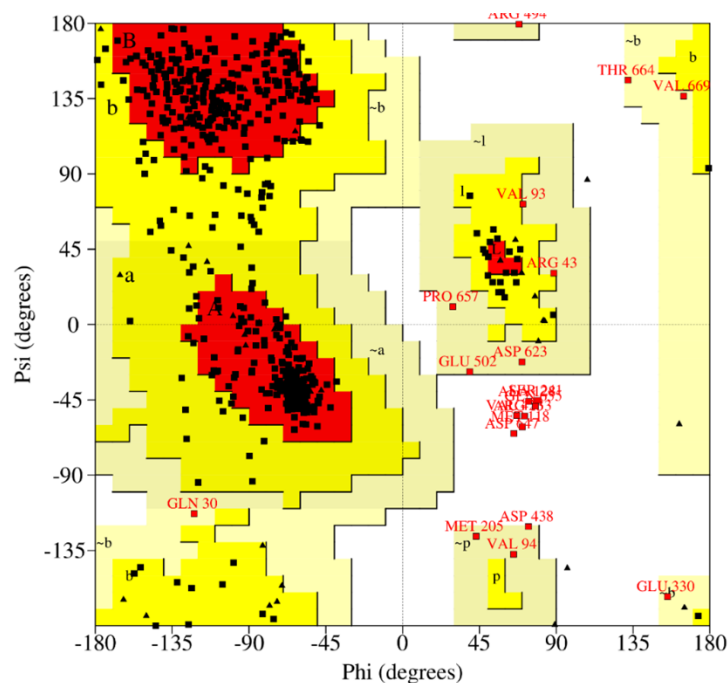

**Figure S3:** Ramachandran plot illustrating the stereochemical geometry of the predicted model of MCM7 for structure validation

**Table S1:** List of the average distance between ligand atom and the side chain of the protein residue involved in each of the observed  $\pi$ -alkyl and alkyl-alkyl interactions obtained from the MD simulation

| <b>Compound Name</b> | <b>Interaction type</b> | <b>Residues</b> | <b>Distance (Å)</b> |
|----------------------|-------------------------|-----------------|---------------------|
| Ergocalciferol       | Alkyl                   | <i>Tyr 345</i>  | 4.32± 1.2           |
|                      | Pi-Alkyl                | <i>Tyr 539</i>  | 3.58±0.8            |
| Cholecalciferol      | Alkyl                   | <i>Tyr 539</i>  | 4.78±1.3            |
|                      | Pi-Alkyl                | <i>Pro 548</i>  | 6.2±2.0             |
| Ergosterol           | Alkyl                   | <i>Ala 338</i>  | 7.6±1.6             |
|                      | Pi-Alkyl                | <i>Tyr 345</i>  | 5.6±0.2             |
| Menaquinone          | Alkyl                   | <i>Ala 338</i>  | 3.6±0.9             |
|                      | Alkyl                   | <i>Pro 547</i>  | 5.4±1.06            |
|                      | Alkyl                   | <i>Pro 548</i>  | 5.08±0.6            |
|                      | Pi-sigma                | <i>Phe 551</i>  | 8.0±0.93            |
